# Supplementary material for: "Until death do us part". A multidisciplinary study on human- Animal co- burials from the Late Iron Age necropolis of Seminario Vescovile in Verona (Northern Italy, 3rd-1st c. BCE)
Source: PLoS One. 2024 Feb 14;19(2):e0293434. doi: 10.1371/journal.pone.0293434 (PMC10866530; doi:10.1371/journal.pone.0293434)
Supplement: S2 Table — US: stratigraphic unit, NA: not assessable, F: female, M: male, y: years, m: months, w: weeks, * contaminated library. (XLSX) [file pone.0293434.s002.xlsx]

## Sheet: S2 Table
	Site	Genetic ID	ID Anthro	Age at death	Sex (Anthro)	Sex (Mol)	mtDNA Haplogroup	Y-chromosomal haplogroup (yleaf)
	Seminario Vescovile Verona	3196	US 2603	>50 y	M	XX	U5b1b2	-
	Seminario Vescovile Verona	3206	US 2894	>50 y	M	XY	J1c3	I2a1b1a1b1~
	Seminario Vescovile Verona	3212	US 3178	2-3 m	NA	XY*	NA	NA
	Seminario Vescovile Verona	3214	US 3190	8-16 m	NA	XY	U5a1a2b	R1b1a1b1a1a2c1
	Seminario Vescovile Verona	3217	US 3212	6-9 m	NA	XX	T2h2	-
	Seminario Vescovile Verona	3220	US 3231	20-35 y	M	XY	X2b6	R1b1a1b1a1a2b1
	Seminario Vescovile Verona	3225	US 3267	36-50 y	F	XX	U5b1e1	-
	Seminario Vescovile Verona	3227	US 3277	36-50 y	M	XY	U5b3	R1b1a1b1a2a1
	Seminario Vescovile Verona	3265	US 2731	36-50 y	F	XX	H4a1c1a	-
	Seminario Vescovile Verona	3267	US 2758	38w	NA	XX	T1a1	-
	Seminario Vescovile Verona	3287	US 3251	20-35 y	M	XY*	H	I1
	Seminario Vescovile Verona	3298	US 3989	>50 y	F	XX	H6a1b2	-
	Seminario Vescovile Verona	3779	US 2515f	38-40 weeks intra utero	NA	XX	H13b1+200	-
	Seminario Vescovile Verona	US3159	US 3159	20-35 y	M	XY	K1a+195	R1b1a1b1a1a2b
	Seminario Vescovile Verona	3232	US 3948	20-35 y	M	XY*	H1e1a	R1b1a1b1a1a2c1a1a1a1a1e~
