# Supplementary material for: "Until death do us part". A multidisciplinary study on human- Animal co- burials from the Late Iron Age necropolis of Seminario Vescovile in Verona (Northern Italy, 3rd-1st c. BCE)
Source: PLoS One. 2024 Feb 14;19(2):e0293434. doi: 10.1371/journal.pone.0293434 (PMC10866530; doi:10.1371/journal.pone.0293434)
Supplement: S7 Table — (XLSX) [file pone.0293434.s007.xlsx]

## Sheet: S7 Table
	US	R femur					R tibia	R calcaneus	L talus		R talus
		Bp	Bd	SD	GL	GLC	Bp	GL	GL1	GLm	GL1	GLm
	tb 7/90	53.65	49.8	19.1	215	197.5		64.3+x	34.2	32.5
	tb 7/91			17.9		173.5	41.2				37.3	35.7
